# Supplementary material
Source: PubMed Central journal article supplement (PMC5473213)
Supplement: 10.1074_M117.789800_jbc.M117.789800-1.pdf [file 10.1074_M117.789800_jbc.M117.789800-1.pdf]

## Supplemental Data

### The mitochondrial outer membrane protein mitoNEET is a redox enzyme catalyzing electron transfer from FMNH<sub>2</sub> to oxygen or ubiquinone

Yiming Wang, Aaron P. Landry, and Huangen Ding

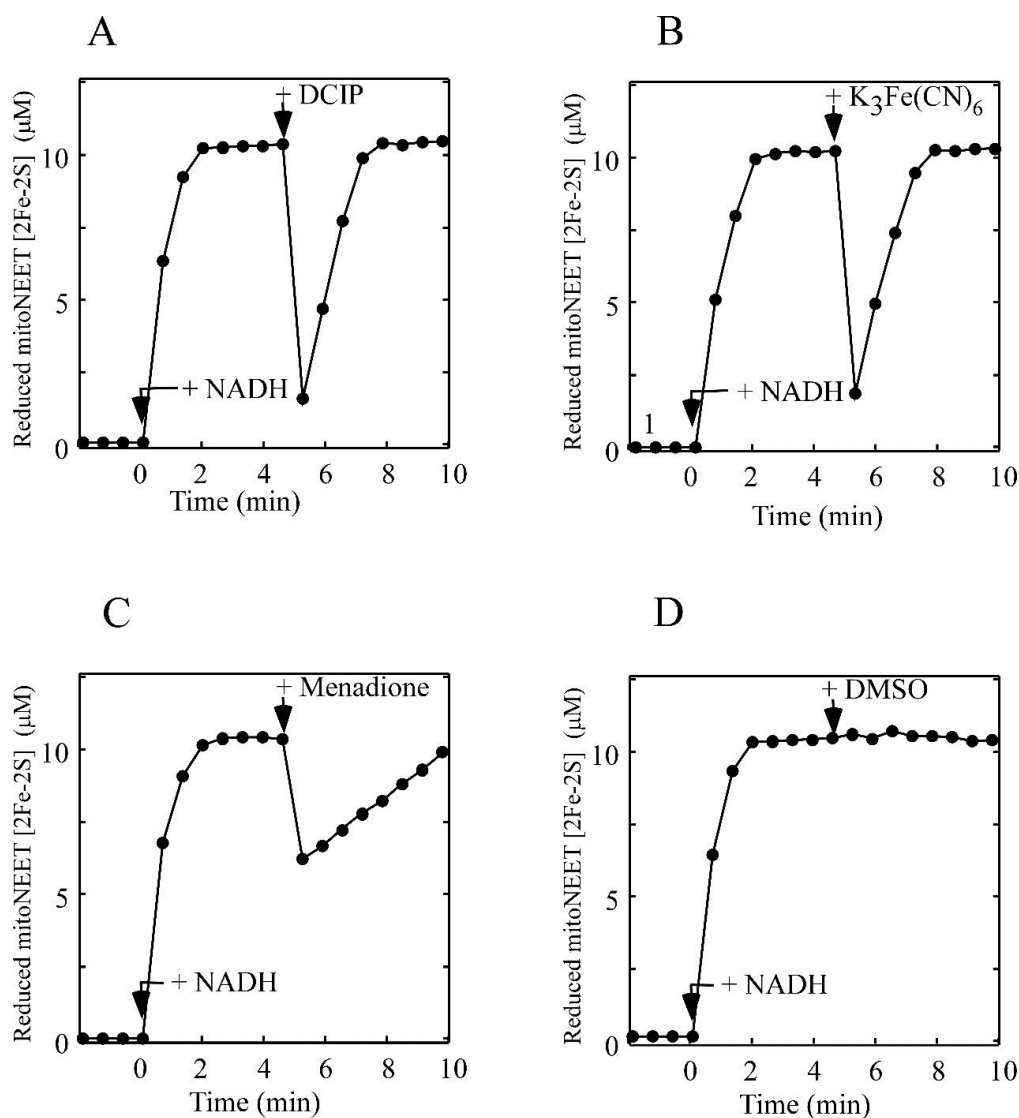

**Supplemental Figure. Oxidation of the reduced mitoNEET [2Fe-2S] clusters by other oxidants.** MitoNEET (containing 10 μM [2Fe-2S] clusters) was pre-reduced with FMN (0.1 μM) and NADH (50 μM) and flavin reductase (0.1 μM) under anaerobic conditions. Each oxidant (10 μM) was injected into the incubation solution anaerobically as indicated. The reduced mitoNEET [2Fe-2S] clusters were measured from the different absorption at the peaks of 455 nm and 420 nm, and plotted as function of the incubation time. **A**), dichlorophenolindophenol (DCIP); **B**), K<sub>3</sub>Fe(CN)<sub>6</sub>; **C**), menadione dissolved in DMSO; **D**), DMSO.
